# Supplementary material for: Detrimental Impact of Energy Drink Compounds on Developing Oligodendrocytes and Neurons
Source: PubMed Central journal article supplement (PMC6912672; doi:10.3390/cells8111381), 2019-11-03
Supplement: cells-08-01381-s001.pdf [file cells-08-01381-s001.pdf]

| Immature oligodendrocyte               |        | treatment                  |                              |                            |                                             | F-statistics              | p-value derived from one way ANOVA | p-value derived from Bonferroni post hoc test |           |                 |                  |                 |
|----------------------------------------|--------|----------------------------|------------------------------|----------------------------|---------------------------------------------|---------------------------|------------------------------------|-----------------------------------------------|-----------|-----------------|------------------|-----------------|
| Analysis, unit                         | Figure | Control (ct) Mean $\pm$ SD | Caffeine (caf) Mean $\pm$ SD | Taurine (ta) Mean $\pm$ SD | caffeine + taurine (caf + ta) Mean $\pm$ SD |                           |                                    | ct vs. caf                                    | ct vs. ta | ct vs. caf + ta | caf vs. caf + ta | ta vs. cat + ta |
| Olig2 cells/mm <sup>2</sup>            | 1B     | 314.2 $\pm$ 40.12          | 192.2 $\pm$ 60.26            | 188.6 $\pm$ 59.62          | 188.1 $\pm$ 68.08                           | F <sub>3,56</sub> = 17.33 | <0.0001                            | <0.0001                                       | <0.0001   | <0.0001         | >0.9999          | >0.9999         |
| A2B5 area/mm <sup>2</sup>              | 1C     | 0.210814 $\pm$ 0.039544    | 0.137515 $\pm$ 0.046613      | 0.105316 $\pm$ 0.039983    | 0.111146 $\pm$ 0.048131                     | F <sub>3,56</sub> = 18.43 | <0.0001                            | 0.0001                                        | <0.0001   | <0.0001         | 0.5215           | >0.9999         |
| PCNA <sup>+</sup> cells of Olig2 [%]   | 2B     | 40.15 $\pm$ 10.8           | 8.674 $\pm$ 7.024            | 19.71 $\pm$ 8.266          | 15.97 $\pm$ 6.151                           | F <sub>3,56</sub> = 40.10 | <0.0001                            | <0.0001                                       | <0.0001   | <0.0001         | 0.0932           | >0.9999         |
| ratio cCaspase-3/ GAPDH                | 2C     | 1.00 $\pm$ 0.1721          | 1.874 $\pm$ 0.2655           | 1.208 $\pm$ 0.4440         | 3.054 $\pm$ 1.301                           | F <sub>3,12</sub> = 6.886 | 0.0060                             | 0.5253                                        | >0.9999   | 0.0071          | 0.1780           | 0.0151          |
| <b>Differentiated Oligodendrocytes</b> |        |                            |                              |                            |                                             |                           |                                    |                                               |           |                 |                  |                 |
| Olig2 cells/mm <sup>2</sup>            | 3B     | 368.9 $\pm$ 61.30          | 300.3 $\pm$ 56.29            | 278.1 $\pm$ 40.82          | 248.3 $\pm$ 60.34                           | F <sub>3,56</sub> = 12.91 | <0.0001                            | 0.0063                                        | 0.0002    | <0.0001         | 0.0635           | 0.7314          |
| % MBP cells                            | 3C     | 93.29 $\pm$ 2.708          | 85.29 $\pm$ 4.673            | 85.98 $\pm$ 3.219          | 84.69 $\pm$ 4.034                           | F <sub>3,56</sub> = 17.43 | <0.0001                            | <0.0001                                       | <0.0001   | <0.0001         | >0.9999          | >0.9999         |

**Supplementary table 1:** Detailed results of statistical analyses for effects on oligodendrocytes.

| Neurons 4d                              |               | treatment                     |                                 |                               |                                                | F-statistics        | p-value derived from one way ANOVA | p-value derived from Bonferroni post hoc test |           |                 |                  |                 |
|-----------------------------------------|---------------|-------------------------------|---------------------------------|-------------------------------|------------------------------------------------|---------------------|------------------------------------|-----------------------------------------------|-----------|-----------------|------------------|-----------------|
| Analysis, unit                          | Figure        | Control (ct)<br>Mean $\pm$ SD | Caffeine (caf)<br>Mean $\pm$ SD | Taurine (ta)<br>Mean $\pm$ SD | caffeine + taurine (caf + ta)<br>Mean $\pm$ SD |                     |                                    | ct vs. caf                                    | ct vs. ta | ct vs. caf + ta | caf vs. caf + ta | ta vs. cat + ta |
| Number total dendrites/cell             | 4B            | 5.758<br>$\pm$ 2.865          | 3.944<br>$\pm$ 1.818            | 3.313<br>$\pm$ 1.361          | 3.825<br>$\pm$ 1.855                           | $F_{3,370} = 25.07$ | <0.0001                            | <0.0001                                       | <0.0001   | <0.0001         | >0.9999          | 0.4784          |
| Number primary dendrites/cell           | 4C            | 3.141<br>$\pm$ 1.161          | 2.899<br>$\pm$ 1.001            | 2.759<br>$\pm$ 0.9317         | 2.864<br>$\pm$ 1.048                           | $F_{3,370} = 2.251$ | 0.0820                             | 0.5632                                        | 0.0716    | 0.2996          | >0.9999          | >0.9999         |
| Number higher dendrites/cell            | 4D            | 3.866<br>$\pm$ 2.322          | 2.514<br>$\pm$ 0.9316           | 2.087<br>$\pm$ 0.5146         | 2.622<br>$\pm$ 1.320                           | $F_{3,160} = 9.699$ | <0.0001                            | 0.0007                                        | 0.0002    | 0.0016          | >0.9999          | >0.9999         |
| Total dendrite length/cell [ $\mu$ m]   | 4E            | 240.6<br>$\pm$ 98.65          | 170.0<br>$\pm$ 83.77            | 154.3<br>$\pm$ 76.92          | 187.4<br>$\pm$ 82.16                           | $F_{3,370} = 17.76$ | <0.0001                            | <0.0001                                       | <0.0001   | <0.0001         | 0.8219           | 0.0483          |
| Primary dendrite length/cell [ $\mu$ m] | 4F            | 140.7<br>$\pm$ 75.17          | 132.9<br>$\pm$ 65.83            | 133.1<br>$\pm$ 70.10          | 154.5<br>$\pm$ 75.70                           | $F_{3,370} = 1.921$ | 0.1258                             | >0.9999                                       | >0.9999   | 0.8654          | 0.1922           | 0.2231          |
| Higher dendrite length/cell [ $\mu$ m]  | 4G            | 147.6<br>$\pm$ 87.25          | 89.34<br>$\pm$ 41.79            | 80.03<br>$\pm$ 38.16          | 89.00<br>$\pm$ 56.11                           | $F_{3,160} = 10.97$ | <0.0001                            | <0.0002                                       | 0.0003    | 0.0001          | >0.9999          | >0.9999         |
| Map2 cells/mm <sup>2</sup>              | Supplementary | 131.6<br>$\pm$ 92.21          | 79.21<br>$\pm$ 55.96            | 80.45<br>$\pm$ 73.89          | 58.86<br>$\pm$ 32.59                           | $F_{3,102} = 5.451$ | 0.0016                             | 0.0337                                        | 0.0303    | 0.0011          | >0.9999          | >0.9999         |

| Neurons d8                        |    |                 |                 |                  |                 |                                |         |         |         |         |         |         |
|-----------------------------------|----|-----------------|-----------------|------------------|-----------------|--------------------------------|---------|---------|---------|---------|---------|---------|
| Number total dendrites/cell       | 5B | 9.560<br>±4.595 | 5.293<br>±2.669 | 5.603<br>±2.645  | 5.062<br>±2.315 | F <sub>3, 312</sub> =<br>34.89 | <0.0001 | <0.0001 | <0.0001 | <0.0001 | >0.9999 | >0.9999 |
| Number primary dendrites/cell     | 5C | 3.547<br>±1.482 | 3.207<br>±1.141 | 3.167<br>±0.9989 | 3.123<br>±1.100 | F <sub>3, 312</sub> =<br>2.020 | 0.1111  | 0.3761  | 0.2458  | 0.1358  | >0.9999 | >0.9999 |
| Number higher dendrites/cell      | 5D | 6.731<br>±3.800 | 3.353<br>±2.217 | 3.725<br>±2.011  | 3.413<br>±1.939 | F <sub>3, 211</sub> =<br>21.75 | <0.0001 | <0.0001 | <0.0001 | <0.0001 | >0.9999 | >0.9999 |
| Total dendrite length/cell [µm]   | 5E | 401.9<br>±161.5 | 288.8<br>±198.5 | 269.9<br>±115.0  | 257.1<br>±92.21 | F <sub>3, 312</sub> =<br>15.35 | <0.0001 | <0.0001 | <0.0001 | <0.0001 | >0.9999 | >0.9999 |
| Primary dendrite length/cell [µm] | 5F | 152.0<br>±85.47 | 184.7<br>±111.7 | 164.7<br>±78.91  | 180.6<br>±89.43 | F <sub>3, 312</sub> =<br>2.061 | 0.1053  | 0.1390  | >0.9999 | 0.2730  | >0.9999 | >0.9999 |
| Higher dendrite length/cell [µm]  | 5G | 279.8<br>±165.8 | 167.5<br>±148.2 | 160.8<br>±94.24  | 134.7<br>±76.62 | F <sub>3, 211</sub> =<br>14.50 | <0.0001 | <0.0001 | <0.0001 | <0.0001 | >0.9999 | >0.9999 |

Supplementary table 2: Detailed results of statistical analyses for effects on hippocampal neurons.

Supplementary Figure S1

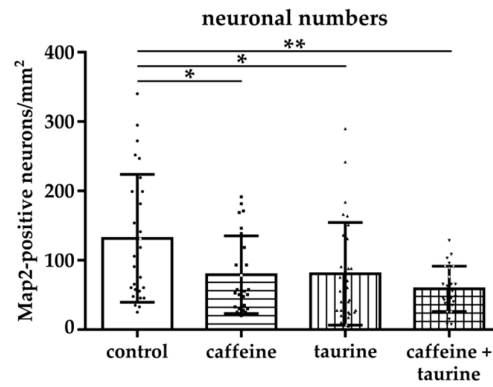

**Supplementary Figure S1: Caffeine and taurine reduce the number of hippocampal neurons.** After a culture-period of three days hippocampal neurons were treated with 0.3 mg/ml caffeine and 4 mg/ml taurine alone or in combination for 24 h. The density of hippocampal neurons was quantified by counting Map2/DAPI-double-positive cells. Data are derived from 24-30 images of three independent experiments. \* $p < 0.05$ , \*\* $p < 0.01$ , one-way ANOVA followed by a Bonferroni post hoc test.
